# Supplementary material for: Longitudinal associations of childhood bedtime and sleep routines with adolescent body mass index
Source: Oxford University Press journal article supplement (doi:10.1093/sleep/zsy202), 2018-12-04
Supplement: zsy202_suppl_supplementary_table-1.docx [file zsy202_suppl_supplementary_table-1.docx]

Supplementary Table 1.Latent Class Solutions

|  | ***Log likelihood*** | ***AIC*** | ***BIC*** | ***Sample-size Adjusted BIC*** | ***Entropy*** | ***VLMR-LRT, P-Value*** |
| --- | --- | --- | --- | --- | --- | --- |
| 2-class | -13003.54 | 26065.07 | 26229.85 | 26137.72 | 0.963 | 0.0000 |
| 3-class | -12769.56 | 25627.11 | 25877.12 | 25737.33 | 0.689 | 0.0000 |
| **4-class** | **-12640.70** | **25399.40** | **25734.64** | **25547.19** | **0.769** | **0.0000** |
| 5-class | -12583.24 | 25314.48 | 25734.95 | 25499.84 | 0.748 | 1.0000 |
| 6-class | -12539.72 | 25257.43 | 25763.13 | 25480.37 | 0.773 | 0.5083 |

*Note*. N=2,169. Considering these model fit criteria, the 4-class solution was selected (see Methods).
